# Supplementary material
Source: PubMed Central journal article supplement (PMC4159403)

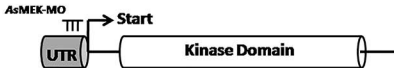

CTACTATCTGCTATTTGGCACCTTGTATCGGATTAGTTCAGTTAATACACCCAAG  
GACACATTTCTTGTAATATCA(ATG)AGTAAGATGACTAAAAACAAACTTAATTTGAC  
 GTTGCCGCCTGGTTCGGTGGATGTTCCCGCTGGGCAGCAAACAACGCCAACACCC  
 TCCTTCAAACGCCATCCGGAACCGAGTACGTCATTGGCAAACATAATCTGTTGGG  
 AAAAGCGAAAAACAGTATTGATGCGCTCACGGAACTTTGGAAGAACTTGAAATGG  
 AAGAAAGTGCACGCAAACGCATTAAGGATTTCTGAGCCAGAAAGAAAAATCGGC  
 GAGTTGAGCGACGAAGATTTG[GAGAAGC TAGGCCAAC TTGGTTCCGGAAACGGA  
 GGTGTAGTGATGAAAGTGCGCCACATTCCAC TCAAC TTATAATGGC TCGAAAGC  
 TTATCCATTTGGAGGT TAAACCAGCGATAAAAAACAGATCATAAGAGAAC TGAA  
 GGTATTACATGAGTGCAATTTTCC TCACATCGTTGGATTC TACGGTGC TTTCTACA  
 GTGATGGAGAGATAAGCATC TGCATGGAGTATATGGACGGTGGATCGTTAGATT  
 AATCTTGAACGAGC TGGAGAATACCGGAAGCCATTTAGCAAAAATTACATCC  
 GCCGTTCTTAAAGGATTGAGC TACC TCGCGATAAGCACGCAATTAAGCACAGG  
 GACGTCAAGCCGAGCAACATTC TGGTAAACAGTAGCGGAGAGATTAAGATATGT  
 GATTTCCGGCGTTTCCGGACAGC TAATCGATTCAATGGCCAAC TCGTTCTGAGGAA  
 CTCGAAGTTATATGTCGCCCGAACGCC TTCAAGGTACCCATTATTCGGTCCAGTC  
 CGATATATGGTCTCTAGGGCTC TCGTTGGTAGAAATGGCAATCGGAATGTATCCC  
 ATTCCGCCGCCAGATGCTAAAACATTAGACC TTATATTTTCAGGAACGGGGAGAC  
 GATAGTTCCCCCGGT CAGAGCGTTATCGAGCCCAAACC TATGGCCATTTTCGAGC  
 TGCTCGATTACATCGTAAATGAACCGCCACC TAAATTGGAGCATAATTCATTAC  
 CGATAGATTTAAAAAC TTTGTTGACC TTTGCC TGAAGAAAAATCC TGAGGAGCGA  
 GC TGATTTGAAAACAC TAATGAATJATGAATGGATCAAGAACATCGAAACGGGAAGA  
 CGTCGATATTGCCGGATGGGTATGCAAACCATGGATCTAGCACCGTCTACACCG  
 AAAAGAAATGCGTCAACATTTGCAAT

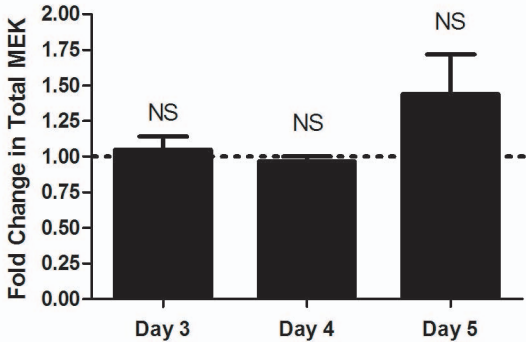

**A.**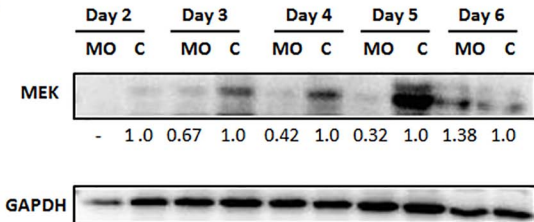**B.**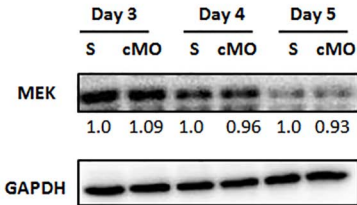

A.

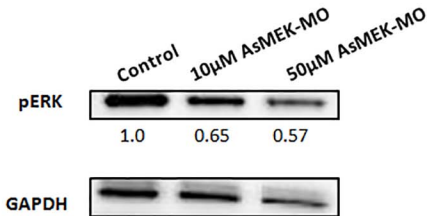

B.

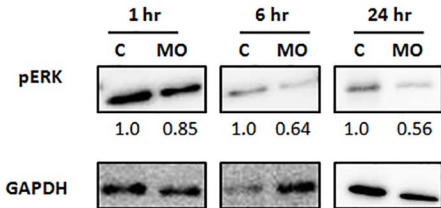

Supplement: NIHMS595159-supplement-Supp_FigureS1-S4.pdf [file NIHMS595159-supplement-Supp_FigureS1-S4.pdf]
